# Supplementary material for: Silibinin Inhibits HIV-1 Infection by Reducing Cellular Activation and Proliferation
Source: PubMed Central journal article supplement (PMC3404953; doi:10.1371/journal.pone.0041832), 2012-07-25

# 72 hours

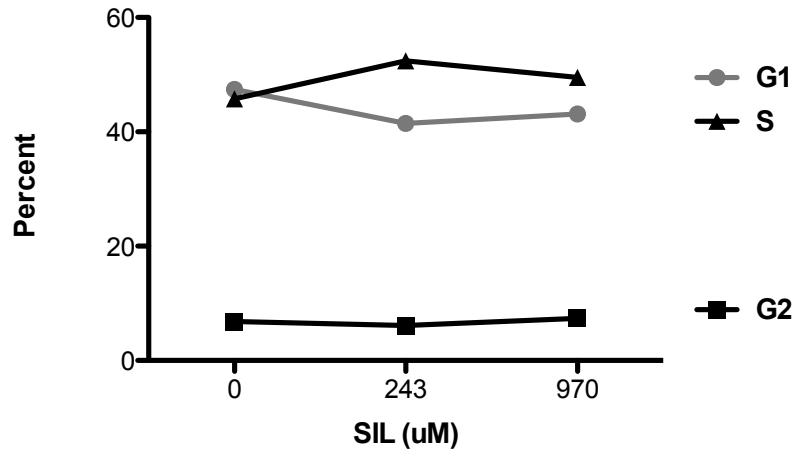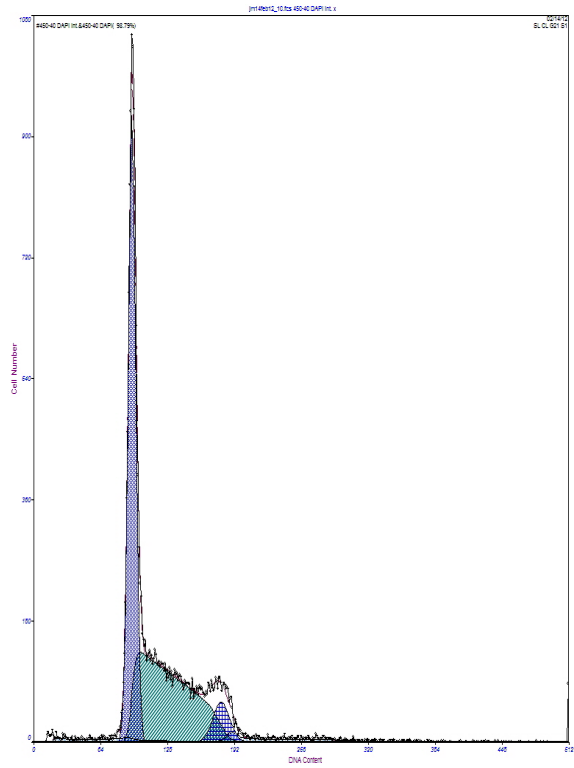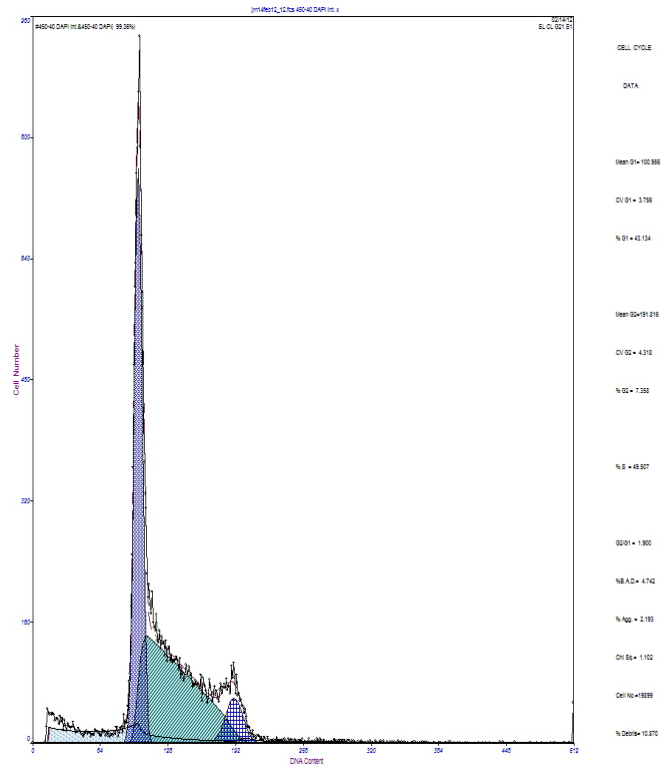

Supplement: pone.0041832.s002.pdf [file pone.0041832.s002.pdf]
